# Supplementary material for: GenomeMUSter mouse genetic variation service enables multitrait, multipopulation data integration and analysis
Source: HighWire-hosted journal article supplement (doi:10.1101/gr.278157.123), 2024-01-01
Supplement: Supplemental_Fig_S2.pdf [file Supplemental_Fig_S2.pdf]

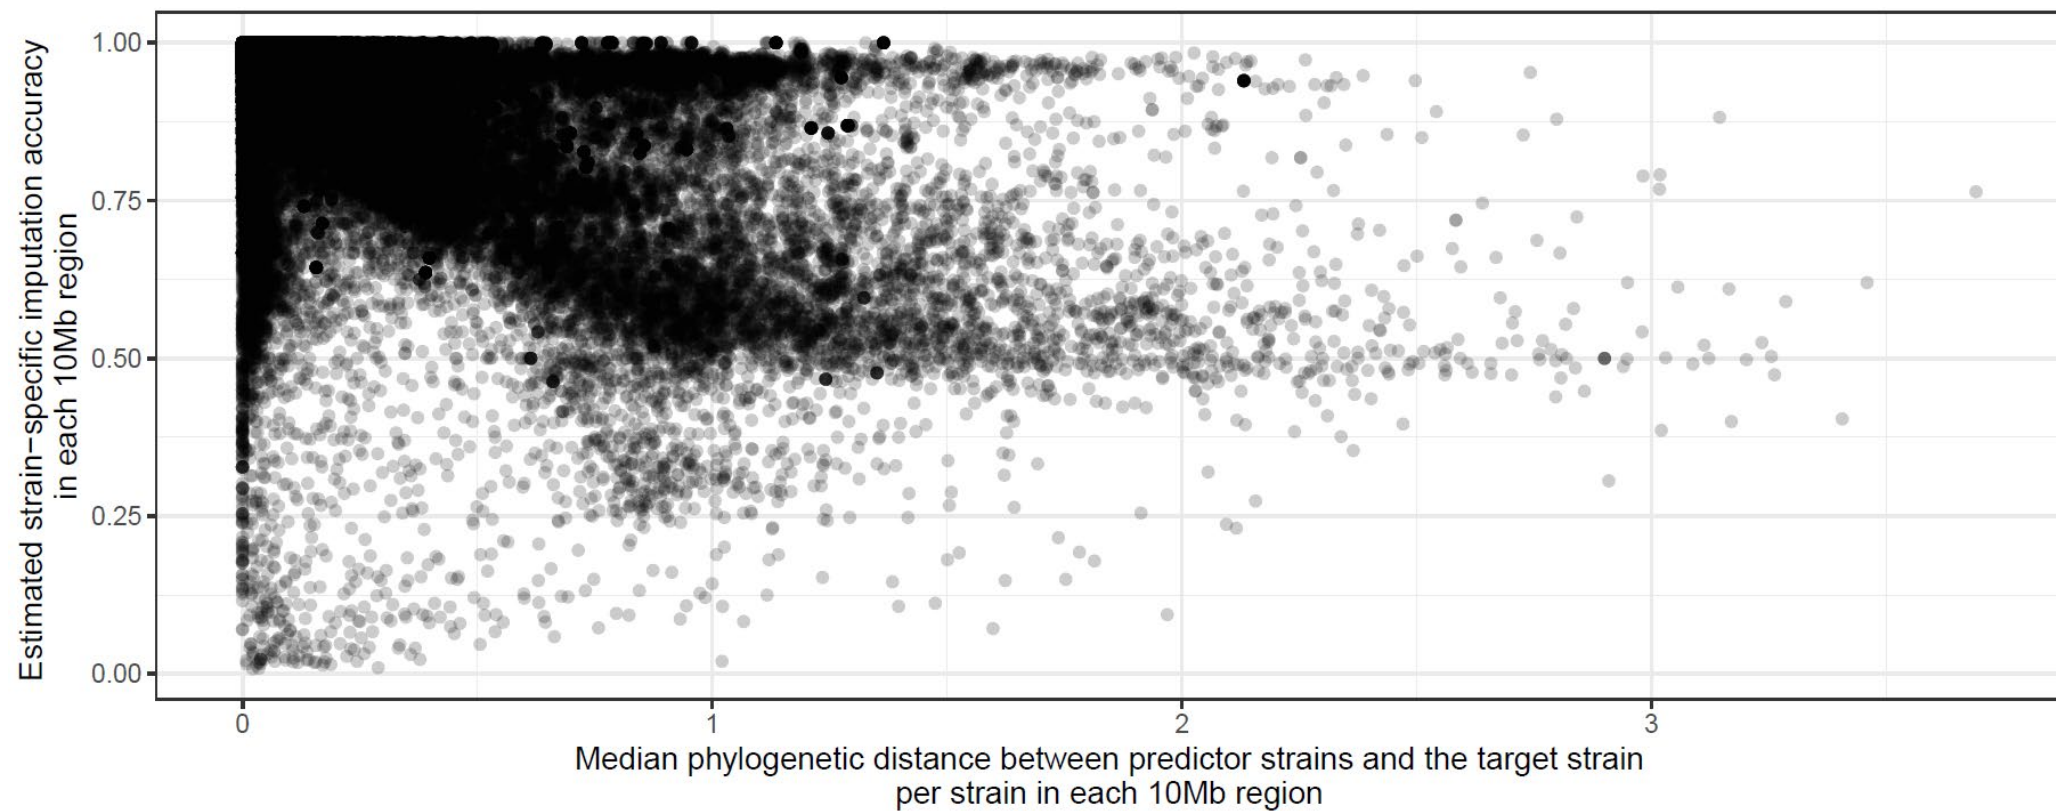

**Supplemental Fig. S2.** Comparison of median phylogenetic distance of predictor strains to the target strain to strain-specific imputation accuracy. Median phylogenetic distance and strain-specific accuracy was calculated per strain in each 10Mb region across chromosomes 1-19 and X.
