# Supplementary material for: GenomeMUSter mouse genetic variation service enables multitrait, multipopulation data integration and analysis
Source: HighWire-hosted journal article supplement (doi:10.1101/gr.278157.123), 2024-01-01
Supplement: Supplemental_Fig_S3.pdf [file Supplemental_Fig_S3.pdf]

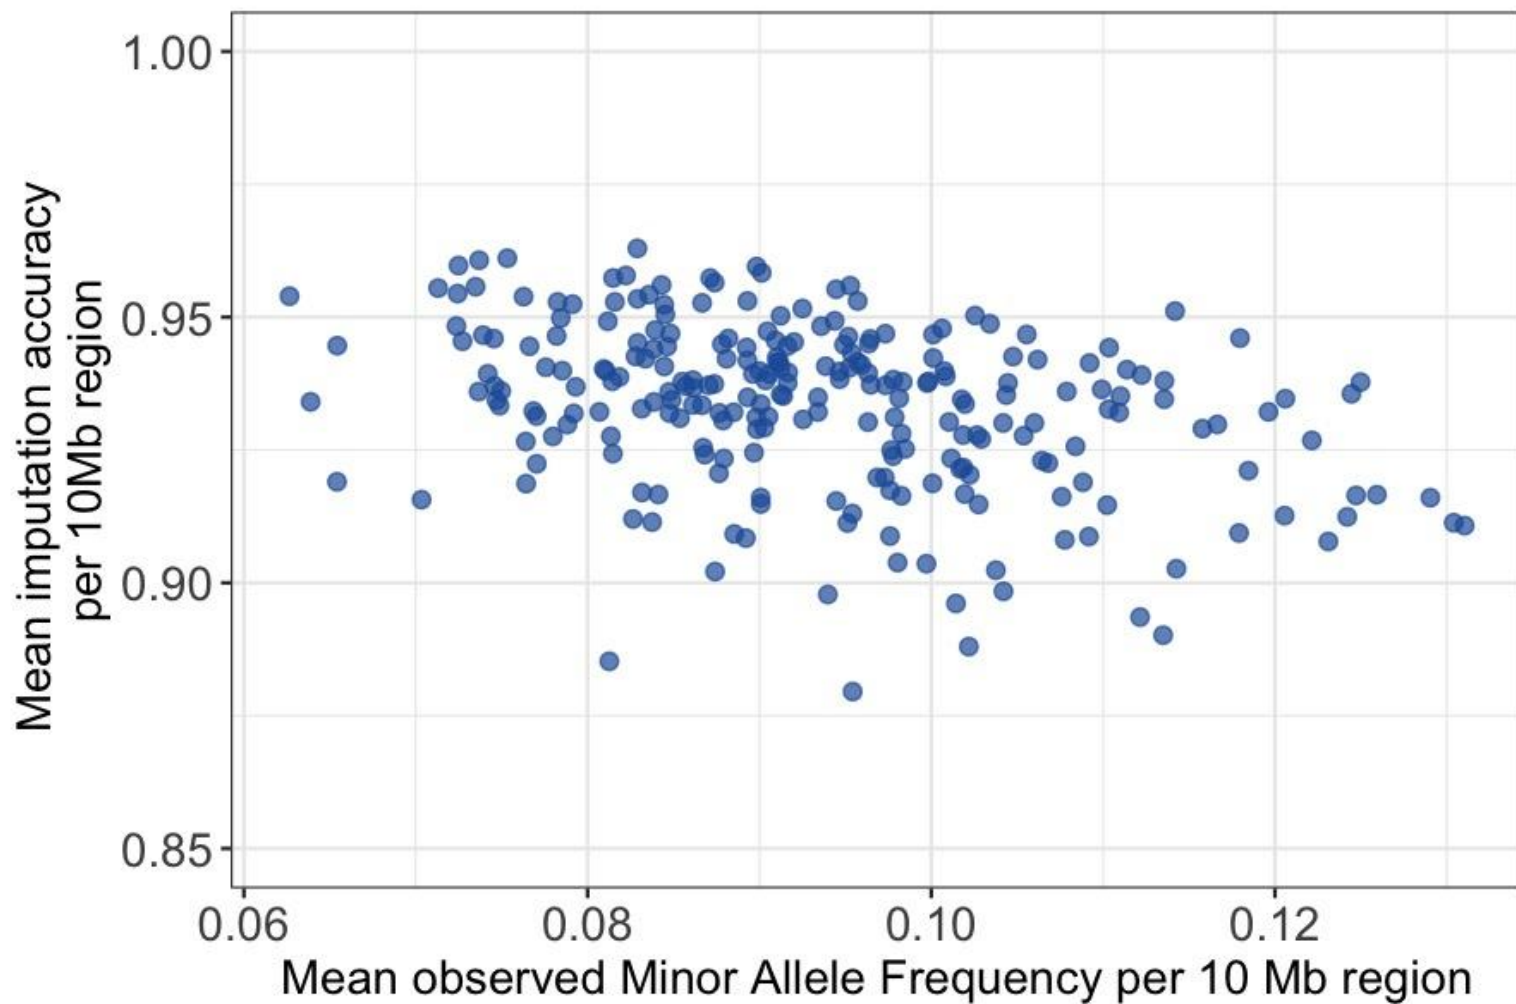

**Supplemental Fig. S3.** Median observed minor allele frequency (x-axis) versus median imputation accuracy (y-axis) in each 10Mb region.
