# Supplementary material for: GenomeMUSter mouse genetic variation service enables multitrait, multipopulation data integration and analysis
Source: HighWire-hosted journal article supplement (doi:10.1101/gr.278157.123), 2024-01-01
Supplement: Supplemental_Fig_S6.pdf [file Supplemental_Fig_S6.pdf]

# GenomeMUSter Search

[Edit Search](#)[New Search](#)[Cite GenomeMUSter](#)[Terms of Use](#)

**Assembly: GRCm38** Displaying 1 - 5,000 of 8,438 rows (4:102,087,582 bp - 4:102,372,539 bp)

Functional annotation and gene columns generated by [MVAR \(Mouse Variation Registry\)](#).

Confidence Threshold  0.7  1 ☒ Show Confidence Level Data 

<< < 1 of 2 > >>

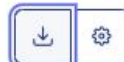

Download Table  
Contents

Download From API

| Chr | Location (bp)             | rsID        | Observed | Functional Annotation (MVAR) | Gene (MVAR) | Reference | DBA/2J | BXD13/Ty J | BXD68/Rww J | 129S1/Sv Im J | A/J | CAST/Ei J | NOD/shi Lt J | NZO/Hi Lt J | PWK | WSB |
|-----|---------------------------|-------------|----------|------------------------------|-------------|-----------|--------|------------|-------------|---------------|-----|-----------|--------------|-------------|-----|-----|
| 4   | <a href="#">102142188</a> | rs28172683  | A/T      | 5_prime_UTR_intron_variant   | Pde4b       | A         | A      | A          | A           | A             | A   | A         | A            | A           | A   | T   |
| 4   | <a href="#">102142210</a> | rs28172682  | T/C      | 5_prime_UTR_intron_variant   | Pde4b       | T         | T      | T          | T           | T             | T   | C         | T            | C           | C   | C   |
| 4   | <a href="#">102142301</a> | rs28172681  | A/G      | 5_prime_UTR_intron_variant   | Pde4b       | A         | A      | A          | A           | A             | A   | G         | A            | G           | G   | G   |
| 4   | <a href="#">102142418</a> | rs28172680  | A/G      | 5_prime_UTR_intron_variant   | Pde4b       | A         | A      | A          | A           | A             | A   | G         | A            | A           | A   | A   |
| 4   | <a href="#">102142420</a> | rs28172679  | G/A      | 5_prime_UTR_intron_variant   | Pde4b       | G         | G      | G          | G           | G             | G   | A         | G            | A           | A   | A   |
| 4   | <a href="#">102142461</a> | rs249536858 | G/T      | 5_prime_UTR_intron_variant   | Pde4b       | G         | G      | G          | G           | G             | G   | T         | G            | G           | G   | G   |

**Supplemental Fig. S6.** Example of GenomeMUSter search results. Local strain-specific confidence levels of imputation accuracy are shown as a heatmap, with lower confidence levels represented by lighter blue and higher confidence levels represented by darker blue. Confidence level thresholds are user-adjustable via the slider, enabling users to filter and download results based on a confidence level threshold.
