# Supplementary material for: GenomeMUSter mouse genetic variation service enables multitrait, multipopulation data integration and analysis
Source: HighWire-hosted journal article supplement (doi:10.1101/gr.278157.123), 2024-01-01
Supplement: Supplemental_Table_S10.pdf [file Supplemental_Table_S10.pdf]

**Supplemental Table S10.** Transition probability parameters used by the Viterbi algorithm implemented in HaploQA for the genotype imputation approach. Code provided in haplohmm.py available at <https://github.com/TheJacksonLaboratory/GenomeMUSter> and in **Supplemental Code**.

| Transition probability parameters           | Description                                                                                                                                                                                                                                                                                                                                                                                                                                                                                                                                                                                                                                |
|---------------------------------------------|--------------------------------------------------------------------------------------------------------------------------------------------------------------------------------------------------------------------------------------------------------------------------------------------------------------------------------------------------------------------------------------------------------------------------------------------------------------------------------------------------------------------------------------------------------------------------------------------------------------------------------------------|
| trans_prob = 0.001                          | the probability of transitioning from one haplotype to another in the space of a single SNP                                                                                                                                                                                                                                                                                                                                                                                                                                                                                                                                                |
| hom_obs_probs =<br>[0.97, 0.01, 0.01, 0.01] | P(obs   homozygous read from hidden state)<br>a numerical array with 4 entries <ul style="list-style-type: none"> <li>0) Probability the observation is homozygous and it matches the hidden state, (A -&gt; A or B -&gt; B)</li> <li>1) Probability the observation is homozygous and the hidden state is homozygous but it does not match the observation, (A -&gt; B or B -&gt; A)</li> <li>2) Probability the observation is homozygous but the hidden state is heterozygous, (A -&gt; H or B -&gt; H)</li> <li>3) Probability the observation is homozygous but the hidden state is missing, e.g. (A -&gt; N or B -&gt; N)</li> </ul> |
| het_obs_probs =<br>[0.98, 0.01, 0.01]       | P(obs   heterozygous read from hidden state)<br>a numerical array with 3 entries <ul style="list-style-type: none"> <li>0) Probability the observation is heterozygous and hidden state is heterozygous, (H -&gt; H)</li> <li>1) Probability the observation is heterozygous and the hidden state is homozygous, (H -&gt; A or H -&gt; B)</li> <li>2) Probability the observation is heterozygous observation but the hidden state is missing, (H -&gt; N)</li> </ul>                                                                                                                                                                      |
| n_obs_probs =<br>[1/3, 1/3, 1/3]            | P(obs   missing data from hidden state)<br>a numerical array with 3 entries <ul style="list-style-type: none"> <li>0) Probability the observation is missing and the hidden state is missing, (N -&gt; N)</li> <li>1) Probability the observation is missing but the hidden state is homozygous, (N -&gt; A or N -&gt; B)</li> <li>2) Probability the observation is missing but the hidden state is heterozygous, (N -&gt; H)</li> </ul>                                                                                                                                                                                                  |
