# Supplementary figures and images for: GenomeMUSter mouse genetic variation service enables multitrait, multipopulation data integration and analysis
Source: HighWire-hosted journal article supplement (doi:10.1101/gr.278157.123), 2024-01-01

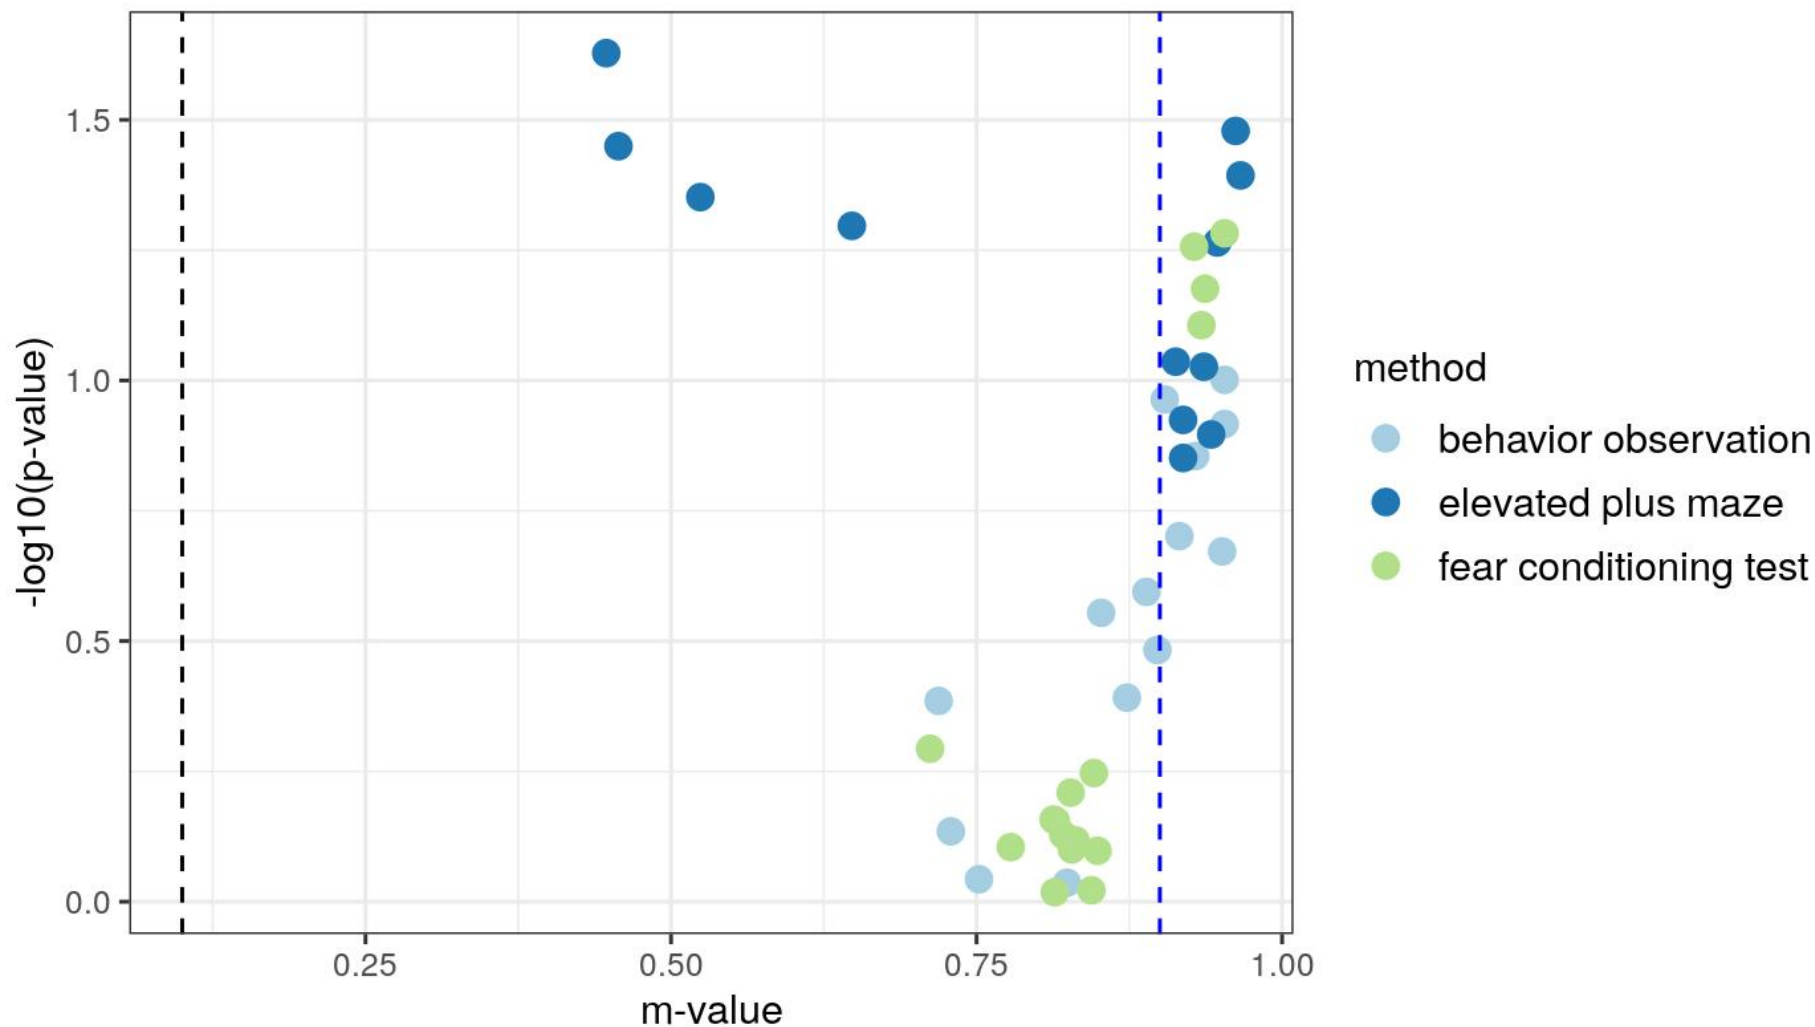

Supplement: Supplemental_Fig_S5.pdf [file Supplemental_Fig_S5.pdf]
